# Supplementary material for: An integrative biological approach to the analysis of tissue culture data: application to the antitumour agent RHPS4
Source: Royal Society of Chemistry journal article supplement (doi:10.1039/c1ib00025j), 2011-01-01
Supplement: c1ib00025j.pdf [file c1ib00025j.pdf]

# An Integrative Biological Approach to the Analysis of Tissue Culture Data: Application to the Antitumour agent RHPS4

Lucy A Johnson<sup>1</sup>, Helen M Byrne<sup>2</sup>, Anne E Willis<sup>3</sup> & Charles A Laughton<sup>1</sup>  
<sup>1</sup>School of Pharmacy, <sup>2</sup>School of Mathematical Sciences, University of Nottingham, Nottingham, UK  
<sup>3</sup>MRC Toxicology Unit, University of Leicester, Leicester, UK

## Supplementary Data

### Development of the Mathematical Model

The five-compartment model that we study is presented in figure 2 in the main paper. We assume that cycling cells flow between compartments G, S and M at rates  $k_{gs}$ ,  $k_{sm}$  and  $k_{mg}$  and exit the cell cycle from compartment G by entering the senescent compartment,  $\Sigma$  at rate  $k_{g\Sigma}$ . Cells in compartment  $\Sigma$  either remain in this compartment or undergo apoptosis at rate  $k_{\Sigma c}$  when they enter compartment C. In practice, cell death can occur at any stage of the cell cycle if conditions are unfavourable or if DNA damage has been sustained. However, for simplicity, we assume that the dominant mechanism for cell death is due to senescent cells undergoing apoptosis. The data available from the cell cycle data enables us to determine  $\frac{G}{N}$ ,  $\frac{S}{N}$ ,  $\frac{M}{N}$  and  $\frac{C}{N}$  (i.e. the proportions of cells in each phase of the cell cycle) whilst the senescence data gives us  $\frac{\Sigma}{N}$ . The population doublings data also gives  $\alpha$  (the overall population growth rate). We now explain how to derive formulae which relate the unknown rate parameters ( $k_{gs}$ ,  $k_{sm}$ , etc) to the known experimental data. The system of ordinary differential equations (ODEs) associated with the five-compartment model depicted in figure 2 can be written as follows:

$$\frac{dG}{dt} = 2k_{mg}M - (k_{gs} + k_{g\Sigma})G \quad (4.3.1)$$

$$\frac{dS}{dt} = k_{gs} G - k_{sm} S \quad (4.3.2)$$

$$\frac{dM}{dt} = k_{sm} S - k_{mg} M \quad (4.3.3)$$

$$\frac{d\Sigma}{dt} = k_{g\Sigma} G - k_{\Sigma c} \Sigma \quad (4.3.4)$$

$$\frac{dC}{dt} = k_{\Sigma c} \Sigma \quad (4.3.5)$$

Since the ODES are linear they admit solutions of the form:

$$G(t) = \hat{G} e^{\alpha t} \text{ etc} \quad (4.3.6)$$

for some constants  $\hat{G}, \hat{S}, \hat{M}, \hat{\Sigma}, \hat{C}$  and  $\alpha$ .

From equations (4.3.1) – (4.3.6), we have the following relationships:

$$\frac{dG}{dt} = \alpha G, \frac{dS}{dt} = \alpha S \quad (4.3.7)$$

And so on. Substituting (4.3.7) into equations (4.3.1) - (4.3.5) and cancelling by a non-zero factor of  $e^{\alpha t}$ , we obtain the following algebraic equations for the constants  $\hat{G}, \hat{S}$  and  $\hat{M}$ , together with expressions for  $\hat{\Sigma}$  and  $\hat{C}$  in terms of  $\hat{G}, \hat{S}, \hat{M}$  and system parameters.

$$\alpha \hat{G} = 2 k_{mg} \hat{M} - (k_{gs} + k_{g\Sigma}) \hat{G}, \quad (4.3.8)$$

$$\alpha \hat{S} = k_{gs} \hat{G} - k_{sm} \hat{S}, \quad (4.3.9)$$

$$\alpha \hat{M} = k_{sm} \hat{S} - k_{mg} \hat{M}, \quad (4.3.10)$$

$$\alpha \hat{\Sigma} = k_{g\Sigma} \hat{G} - k_{\Sigma c} \hat{\Sigma}, \quad (4.3.11)$$

$$\alpha \hat{C} = k_{\Sigma c} \hat{\Sigma}. \quad (4.3.12)$$

We remark that for the five-compartment model, compartments G, S and M control the overall system dynamics since their evolution is independent of  $\Sigma$  and C. Further, an expression relating  $\alpha$  to system parameters can be obtained by combining equations (4.3.8) – (4.3.12) and noting that for a nontrivial solution, we require  $\hat{G}, \hat{S}, \hat{M} > 0$ . After some algebra, we obtain the following cubic relating the growth rate to the kinetic rate parameters.

$$0 = \begin{vmatrix} \alpha + k_{gs} + k_{g\Sigma} & 0 & -2k_{mg} \\ -k_{gs} & \alpha + k_{sm} & 0 \\ 0 & -k_{sm} & \alpha + k_{mg} \end{vmatrix} = (\alpha + k_{gs} + k_{g\Sigma})(\alpha + k_{sm})(\alpha + k_{mg}) - 2k_{mg}k_{gs}k_{sm}$$

The five-compartment model contains five rate parameters. We now explain below how it is possible to derive expressions relating these parameters to the experimental data (i.e.

$$\frac{G}{N}, \frac{S}{N}, \frac{M}{N}, \frac{\Sigma}{N}, \frac{C}{N} \text{ and } \alpha, \text{ where } \hat{N} = \hat{G} + \hat{S} + \hat{M} + \hat{\Sigma} + \hat{C}.$$

Addition of equations (4.3.8) - (4.3.12) yields:

$$\alpha \hat{N} = k_{mg} \hat{G} \text{ or } k_{mg} = \frac{\alpha}{\hat{M}/\hat{N}} \quad (4.3.13)$$

With  $k_{mg}$  specified in terms of  $\alpha$  and  $\frac{\hat{M}}{N}$ , equation (4.3.10) supplies  $\alpha (\hat{N} + \hat{M}) = k_{yz} \hat{Y}$  or

$$k_{sm} = \frac{\alpha(1 + \hat{M}/\hat{N})}{\hat{S}/\hat{N}}. \quad (4.3.14)$$

In a similar manner, equation (4.3.9) supplies the following equation for the rate parameter  $k_{xy}$ :

$$k_{gs} = \alpha \frac{\left\{ 1 + (\hat{S}/\hat{N}) + (\hat{M}/\hat{N}) \right\}}{\hat{G}/\hat{N}}. \quad (4.3.15)$$

Equations (4.3.13) - (4.3.15) specify  $k_{mg}$ ,  $k_{gs}$  and  $k_{sm}$  in terms of the experimental data.

Equations for  $k_{x\Sigma}$  and  $k_{\Sigma A}$  are derived by referring to equations (4.3.8) and (4.3.9) which supply:

$$k_{g\Sigma} = \frac{\alpha(\hat{C}/\hat{N})}{\hat{\Sigma}/\hat{N}} \text{ and } k_{g\Sigma} \hat{G} = (\alpha + k_{\Sigma c}) \hat{\Sigma} \quad (4.3.16)$$

or equivalently,

$$k_{\Sigma c} = \frac{\alpha(\hat{C}/\hat{N})}{\hat{\Sigma}/\hat{N}} \text{ and } k_{x\Sigma} = \frac{\alpha(\hat{C}/\hat{N} + \hat{\Sigma}/\hat{N})}{\hat{G}/\hat{N}} \quad (4.3.17)$$

Equations (4.3.13) - (4.3.17) enable us to specify the five rate parameters,  $k_{gs}$ ,  $k_{sm}$ ,  $k_{mg}$ ,  $k_{g\Sigma}$  and  $k_{\Sigma c}$  from the available data and in doing so, predict the effects of RHPS4, and other anti-tumour agents on the HCT116 cell line that would be difficult to determine otherwise.

## Doxorubicin data

| Day |         | Senescence |      | Doublings |      | Pre-G1 phase |      | G1/G0 phase |      | S phase |     | G2/M phase |     |
|-----|---------|------------|------|-----------|------|--------------|------|-------------|------|---------|-----|------------|-----|
|     |         | Average    | ±SD  | Average   | ±SD  | Average      | ±SD  | Average     | ±SD  | Average | ±SD | Average    | ±SD |
| 4   | Control | 12.3       | 5.5  | 8.9       | 4.8  | 6.4          | 2.2  | 4.5         | 2.1  | 2.9     | 1.3 | 2.1        | 0.8 |
| 4   | 3.15nM  | 12.9       | 5.9  | 9.4       | 4.9  | 6.7          | 2.3  | 4.7         | 2.2  | 3.1     | 1.4 | 2.2        | 0.8 |
| 4   | 6.3nM   | 20.5       | 7.4  | 14.0      | 9.3  | 10.2         | 3.4  | 7.6         | 3.7  | 4.9     | 2.4 | 3.7        | 1.3 |
| 4   | 31.5nM  | 17.7       | 1.8  | 9.7       | 11.3 | 7.6          | 5.1  | 8.0         | 3.1  | 5.4     | 2.5 | 3.7        | 1.5 |
| 4   | 63nM    | 39.7       | 18.3 | 29.0      | 15.2 | 20.8         | 7.3  | 14.4        | 6.8  | 9.5     | 4.3 | 6.9        | 2.6 |
| 6   | Control | 14.2       | 4.7  | 9.4       | 6.7  | 6.9          | 2.4  | 5.4         | 2.6  | 3.4     | 1.7 | 2.6        | 0.9 |
| 6   | 3.15nM  | 18.8       | 3.9  | 11.3      | 10.6 | 8.6          | 4.1  | 7.7         | 3.3  | 5.1     | 2.4 | 3.6        | 1.4 |
| 6   | 6.3nM   | 33.1       | 9.4  | 21.2      | 16.8 | 15.8         | 6.0  | 12.8        | 6.0  | 8.3     | 4.0 | 6.1        | 2.1 |
| 6   | 31.5nM  | 36.7       | 13.7 | 25.2      | 16.2 | 18.4         | 6.0  | 13.6        | 6.6  | 8.7     | 4.2 | 6.5        | 2.3 |
| 6   | 63nM    | 44.9       | 16.8 | 30.8      | 19.9 | 22.5         | 7.4  | 16.6        | 8.1  | 10.7    | 5.1 | 8.0        | 2.8 |
| 10  | Control | 18.0       | 5.6  | 11.8      | 8.7  | 8.7          | 3.1  | 6.9         | 3.3  | 4.4     | 2.1 | 3.3        | 1.1 |
| 10  | 3.15nM  | 21.5       | 7.2  | 14.3      | 10.1 | 10.5         | 3.6  | 8.1         | 3.9  | 5.2     | 2.5 | 3.9        | 1.3 |
| 10  | 6.3nM   | 30.1       | 4.6  | 17.4      | 18.0 | 13.3         | 7.5  | 12.9        | 5.2  | 8.6     | 4.0 | 5.9        | 2.4 |
| 10  | 31.5nM  | 49.7       | 18.8 | 34.3      | 21.9 | 25.0         | 8.2  | 18.3        | 8.9  | 11.8    | 5.7 | 8.8        | 3.1 |
| 10  | 63nM    | 50.3       | 14.3 | 32.3      | 25.4 | 24.0         | 9.1  | 19.5        | 9.1  | 12.5    | 6.0 | 9.2        | 3.3 |
| 14  | Control | 18.5       | 5.6  | 12.1      | 9.2  | 8.9          | 3.3  | 7.1         | 3.4  | 4.6     | 2.2 | 3.4        | 1.2 |
| 14  | 3.15nM  | 27.3       | 6.1  | 16.7      | 14.9 | 12.6         | 5.7  | 11.1        | 4.8  | 7.2     | 3.4 | 5.1        | 1.9 |
| 14  | 6.3nM   | 32.5       | 2.9  | 17.7      | 20.9 | 13.8         | 9.6  | 14.8        | 5.7  | 10.0    | 4.6 | 6.8        | 2.9 |
| 14  | 31.5nM  | 43.6       | 12.7 | 28.2      | 21.9 | 20.9         | 7.8  | 16.8        | 7.9  | 10.8    | 5.2 | 8.0        | 2.8 |
| 14  | 63nM    | 51.7       | 14.6 | 33.2      | 26.3 | 24.7         | 13.1 | 21.4        | 7.2  | 13.9    | 7.1 | 9.4        | 3.9 |
| 21  | Control | 18.8       | 4.9  | 11.9      | 9.8  | 8.9          | 3.6  | 7.4         | 3.4  | 4.8     | 2.3 | 3.5        | 1.3 |
| 21  | 3.15nM  | 30.9       | 10.8 | 20.9      | 14.2 | 15.3         | 5.1  | 11.5        | 5.6  | 7.4     | 3.6 | 5.5        | 1.9 |
| 21  | 6.3nM   | 37.1       | 5.8  | 21.4      | 22.1 | 16.4         | 9.2  | 15.9        | 6.5  | 10.5    | 4.9 | 7.3        | 2.9 |
| 21  | 31.5nM  | 47.3       | 9.4  | 28.3      | 26.8 | 21.5         | 10.5 | 19.6        | 8.3  | 12.8    | 6.0 | 9.0        | 3.5 |
| 21  | 63nM    | 59.1       | 8.7  | 33.9      | 35.7 | 26.1         | 15.1 | 25.6        | 10.3 | 17.0    | 7.8 | 11.7       | 4.7 |

## RHPS4 data

| Day |         | Senescence |      | Doublings |     | Pre-G1 phase |     | G1/G0 phase |      | S phase |      | G2/M phase |       |
|-----|---------|------------|------|-----------|-----|--------------|-----|-------------|------|---------|------|------------|-------|
|     |         | Average    | ±SD  | Average   | ±SD | Average      | ±SD | Average     | ±SD  | Average | ±SD  | Average    | ±SD   |
| 4   | Control | 18.7       | 2.9  | 3.4       | 1.2 | 4.6          | 0.8 | 56.8        | 7.6  | 20.9    | 5.3  | 15.1       | 6.08  |
| 4   | 50nM    | 37.4       | 2.6  | 3.3       | 1.1 | 5.3          | 4.5 | 59.9        | 7.5  | 16.2    | 4.7  | 15.7       | 1.83  |
| 4   | 100nM   | 36.6       | 1.9  | 3.1       | 0.9 | 6.9          | 5.7 | 61.5        | 6.2  | 17.4    | 3.8  | 16.7       | 3.79  |
| 4   | 1uM     | 39.2       |      | 2.5       | 0.9 | 6.7          | 5.5 | 58.4        | 10.7 | 20.2    | 3.6  | 15.3       | 2.40  |
| 6   | Control | 18.8       | 6.8  | 4.5       | 1.1 | 6.2          | 1.6 | 55.6        | 9.7  | 22.1    | 4.0  | 18.9       | 3.22  |
| 6   | 50nM    | 35.1       | 10.3 | 4.0       | 1.1 | 0.9          | 0.6 | 61.1        | 3.6  | 16.8    | 2.2  | 17.0       | 5.23  |
| 6   | 100nM   | 43.8       | 5.1  | 3.7       | 0.7 | 1.8          | 0.9 | 61.3        | 0.4  | 16.7    | 3.2  | 15.7       | 5.16  |
| 6   | 1uM     | 53.1       | 4.9  | 2.6       | 1.1 | 1.2          | 1.7 | 60.7        | 12.1 | 16.7    | 3.5  | 13.1       | 2.81  |
| 10  | Control | 14.8       | 3.0  | 7.7       | 0.9 | 7.1          | 4.4 | 59.0        | 7.9  | 19.4    | 5.1  | 14.8       | 5.17  |
| 10  | 50nM    | 31.4       | 9.9  | 7.0       | 1.1 | 6.6          | 3.1 | 67.8        | 0.3  | 15.8    | 3.9  | 9.2        | 2.00  |
| 10  | 100nM   | 40.8       | 7.4  | 6.4       | 0.9 | 2.9          | 2.8 | 74.3        | 6.3  | 11.9    | 2.7  | 6.0        | 0.57  |
| 10  | 1uM     | 42.9       |      | 3.7       | 1.4 | 1.1          | 0.1 | 70.1        | 6.4  | 11.5    | 3.7  | 15.3       | 5.66  |
| 14  | Control | 19.8       | 4.5  | 9.8       | 1.0 | 4.3          | 3.5 | 51.1        | 5.7  | 20.5    | 2.1  | 22.1       |       |
| 14  | 50nM    | 47.4       | 3.3  | 8.9       | 1.0 | 1.2          | 0.9 | 66.7        | 6.2  | 18.3    | 0.5  | 17.8       | 4.03  |
| 14  | 100nM   | 52.4       | 5.0  | 8.2       | 1.1 | 2.5          | 2.4 | 73.1        | 3.5  | 7.3     | 1.5  | 15.2       | 9.12  |
| 14  | 1uM     | 66.3       |      | 3.3       | 1.5 | 2.9          | 1.2 | 69.1        | 8.5  | 13.1    | 1.6  | 9.9        | 1.98  |
| 21  | Control | 18.0       | 3.1  | 13.2      | 1.0 | 4.4          | 2.7 | 46.9        | 13.3 | 22.7    | 3.6  | 21.3       | 8.24  |
| 21  | 50nM    | 43.6       | 4.8  | 11.5      | 1.0 | 3.0          | 2.4 | 63.2        | 9.9  | 17.6    | 4.3  | 14.6       | 5.85  |
| 21  | 100nM   | 45.8       | 2.8  | 10.7      | 0.8 | 5.1          | 3.0 | 63.5        | 17.4 | 15.5    | 10.3 | 16.1       | 10.31 |
| 21  | 1uM     | 100.0      | 0.0  | 5.1       | 3.3 | 4.4          | 2.6 | 76.8        | 8.4  | 9.6     | 4.3  | 9.8        | 5.16  |
